# Supplementary material for: Quantitative Profiling of Carotenoids, Tocopherols, Phytosterols, and Fatty Acids in the Flower Petals of Ten Marigold (Tagetes spp. L.) Cultivars
Source: MDPI journal article supplement (doi:10.3390/foods12193549), 2023-09-24

**Figure S1. Outline of the method used for extraction of lipophilic compounds containing carotenoids, sterols, and fatty acids**

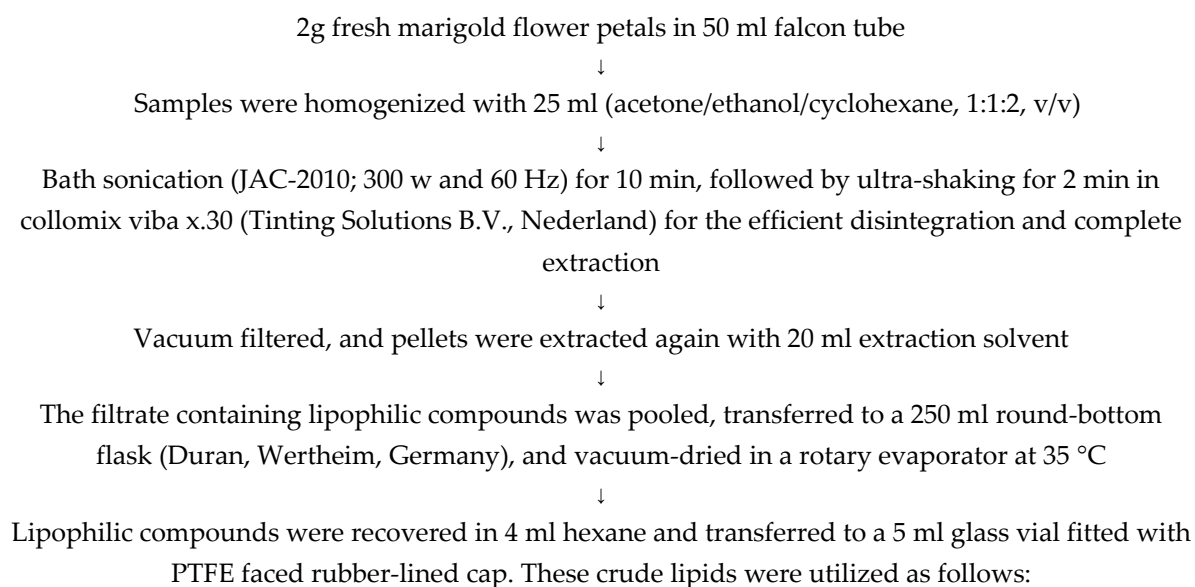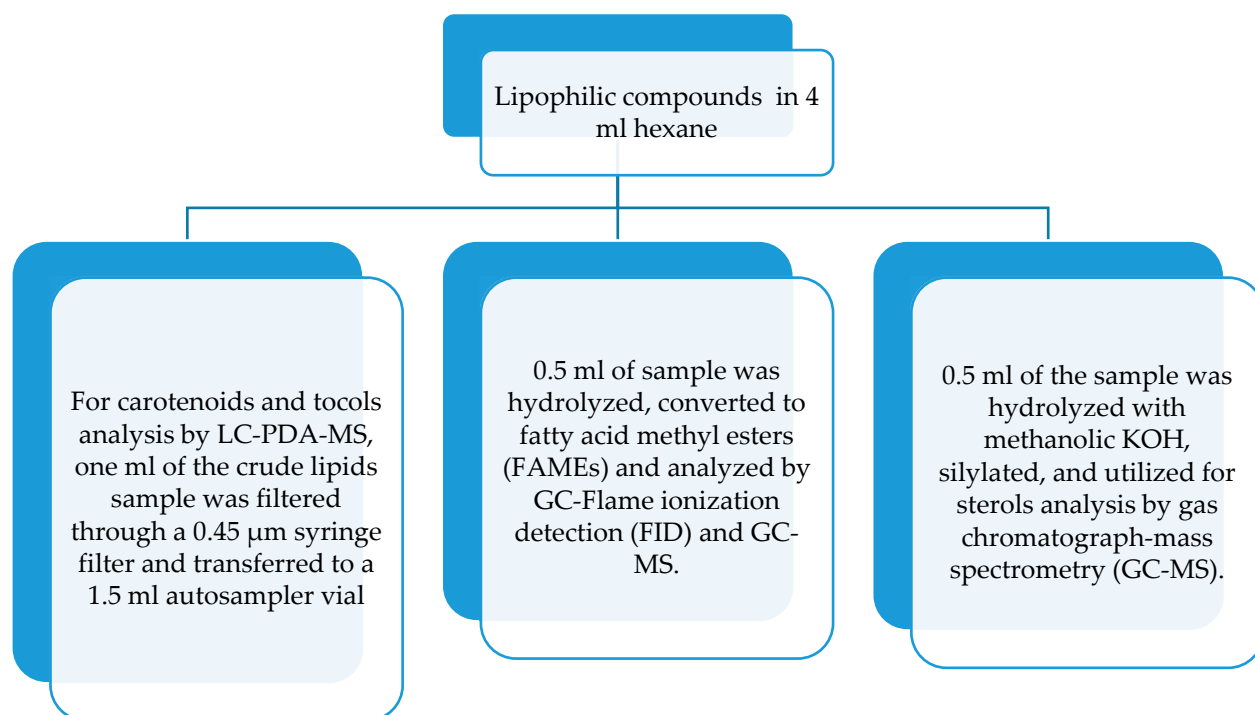

**Figure S2. Outline of methods used for the hydrolysis and fatty acid methyl preparation (FAME) for GC-FID and GC-MS analysis**

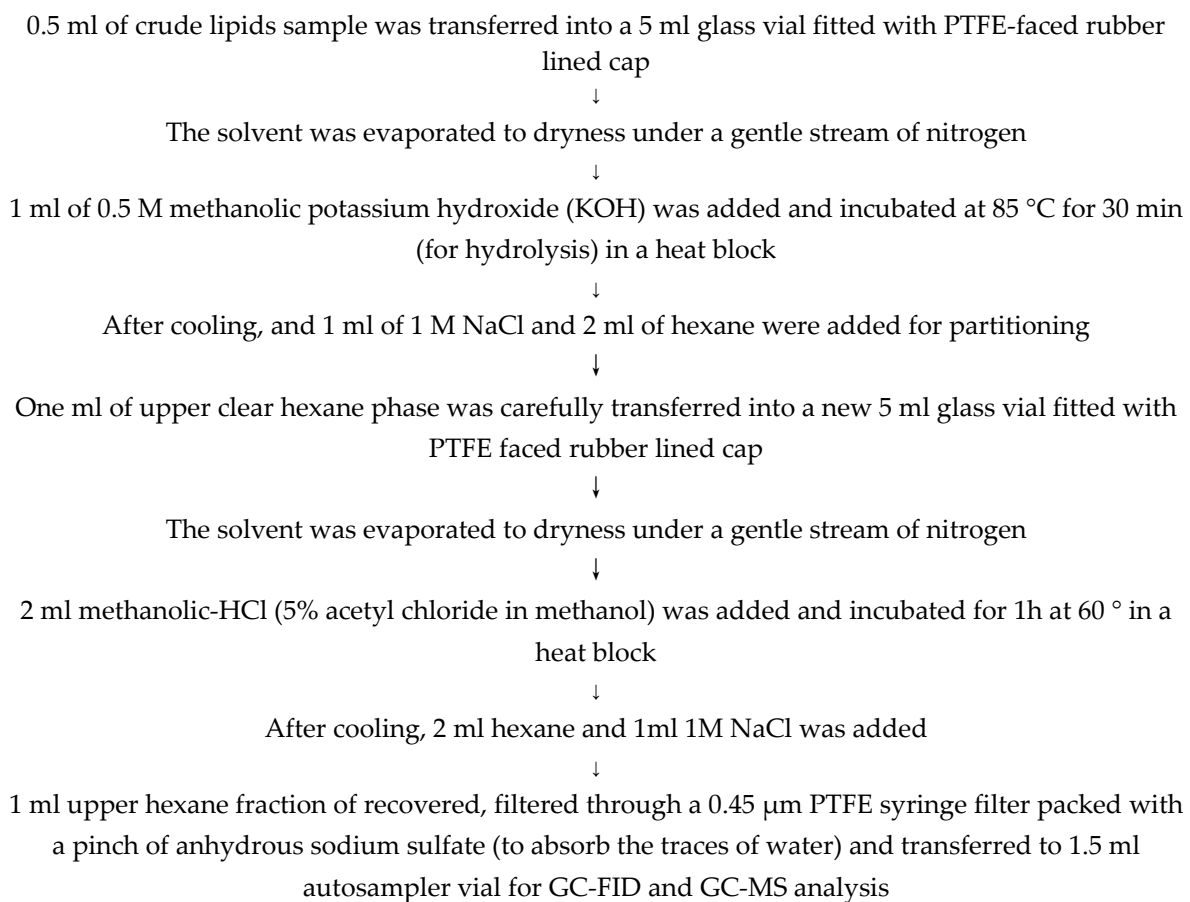

**Figure S3. Outline of methods used for the hydrolysis and silylation of sterols for GC-MS**

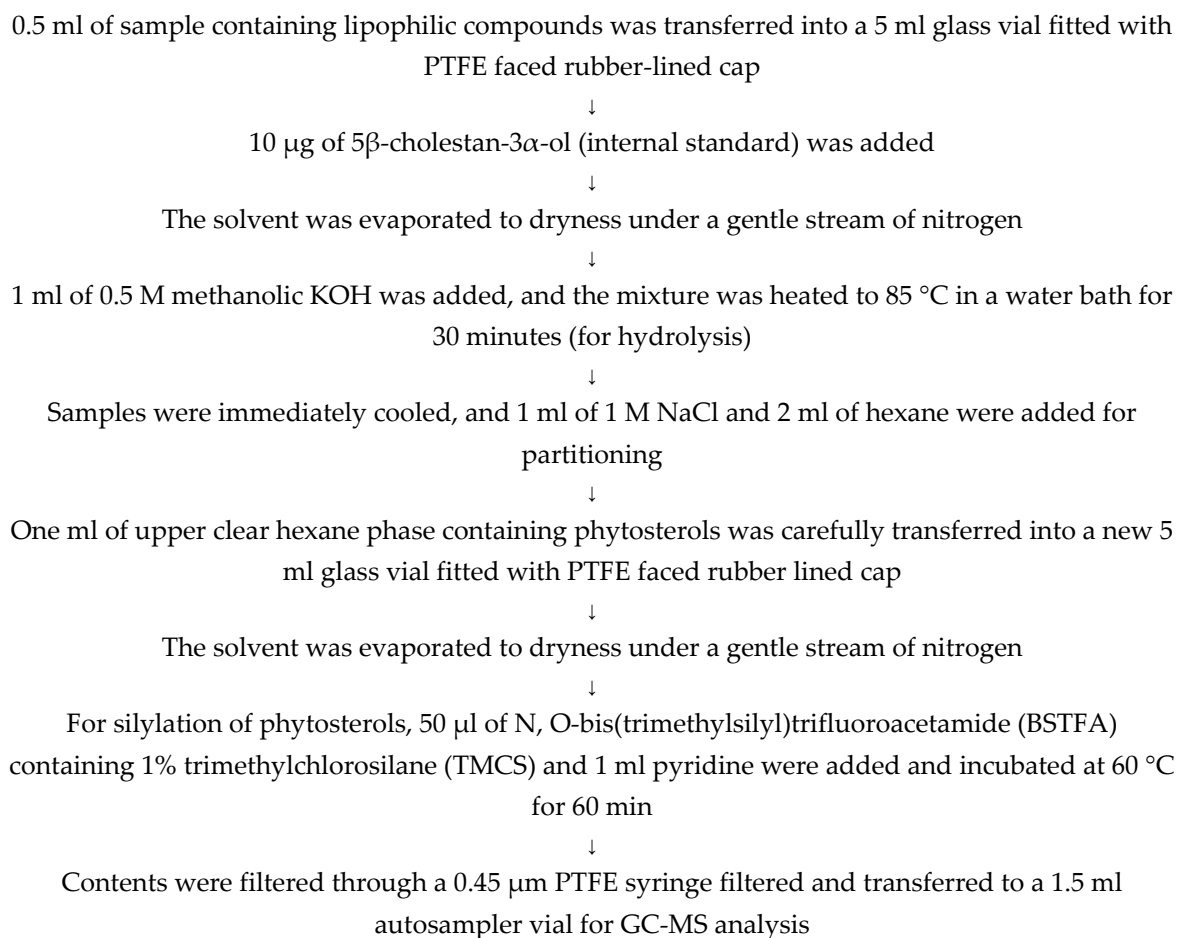

Supplement: s1 [file s1]
